# Supplementary material for: Isoagglutinin Reduction in Human Immunoglobulin Products by Donor Screening
Source: Springer Nature journal article supplement (doi:10.1007/s13554-014-0016-2), 2014-05-19
Supplement: MOESM1 [file 9270870]

- Anti-A/B isoagglutinins (also referred to as isohemagglutinins) originating from donor plasma are present in polyvalent immunoglobulin G products and are considered a probable risk factor for hemolysis.
- A high-throughput, automated method of donor plasma screening for high anti-A isoagglutinin titers has been developed.
- Exclusion of 5% of donors resulted in reduction of the anti-A isoagglutinin titer by one titer step in pooled donor plasma and the final intravenous immunoglobulin (IVIg) product (i.e., Privigen®; CSL Behring, Berne, Switzerland).
- Screening for donors with high anti-A isoagglutinin titers allowed reduction of both anti-A and anti-B isoagglutinin titers.
- Anti-A donor screening can be implemented on an industry scale to reduce anti-A/B isoagglutinins in the final IVIg product.

This summary slide represents the opinions of the authors. This study was conducted and article processing charges were covered by CSL Behring AG, Berne, Switzerland. The authors acknowledge the editorial assistance of Dr Alexey Veligodskiy from Fishawack Communications GmbH, a member of the Fishawack Group of Companies, funded by CSL Behring. For a full list of acknowledgments and conflicts of interest for all authors of this article, please see the full text online. Copyright © The Author(s) 2014. Creative Commons Attribution Noncommercial License (CC BY-NC).
